# Supplementary material
Source: HighWire-hosted journal article supplement (https://jnis.bmj.com/content/14/2/196)
Supplement: inline-supplementary-material-1 [file inline-supplementary-material-1.pdf]

|                                   |           |
|-----------------------------------|-----------|
| Subjects                          | 25        |
| Age (years), avg+/-stdev          | 59 +/- 20 |
| Female, N (%)                     | 8 (40%)   |
| Subdural hematoma                 | 14        |
| Venous sinus thrombosis           | 1         |
| Ethmoid dural fistula             | 2         |
| Ipsilateral frontal brain AVM*    | 1         |
| Cerebral ischemic disease*        | 4         |
| Subarachnoid hemorrhage*          | 2         |
| Epistaxis                         | 1         |
| * no dural-pial anastomosis found |           |

Table 1: Selected patient characteristics

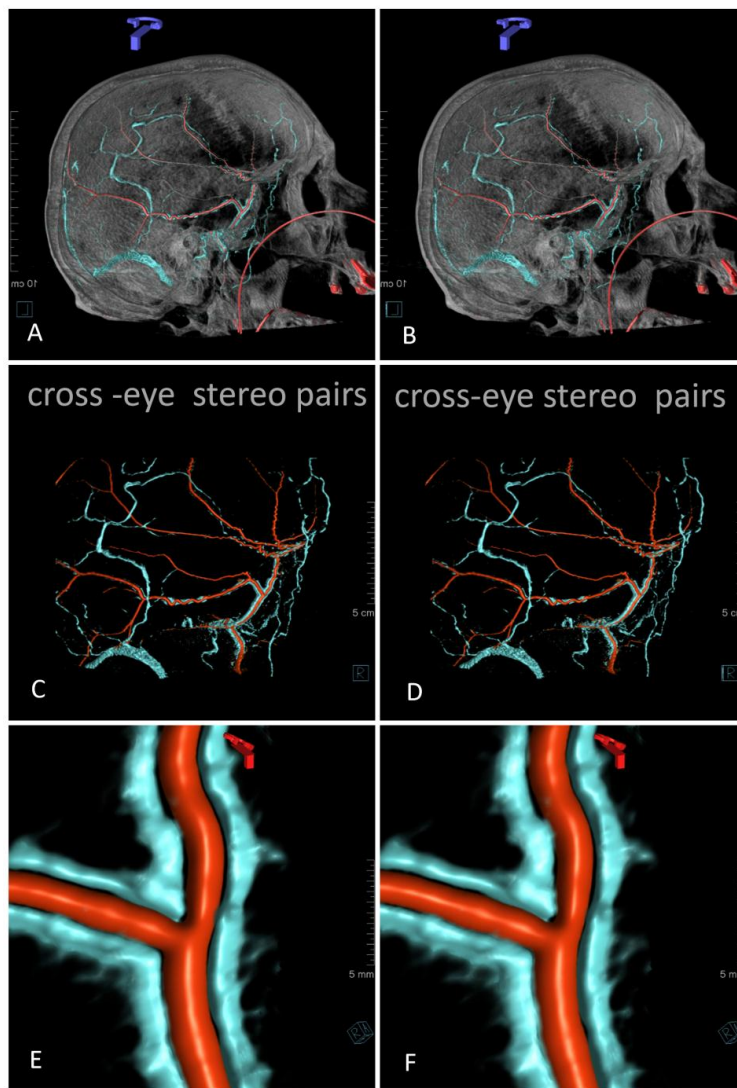

**Supplementary Figure 1 A-F Stereoscopic imaging.** A, B: “triple phase” images. C, D: co-registration of separate arterial and venous phase volume rendered reconstructions of rotational angiography show better resolution of arteries and veins. Arteries appear deep to diploic veins in stereo views. E, F: detailed views of middle meningeal arterial and venous systems

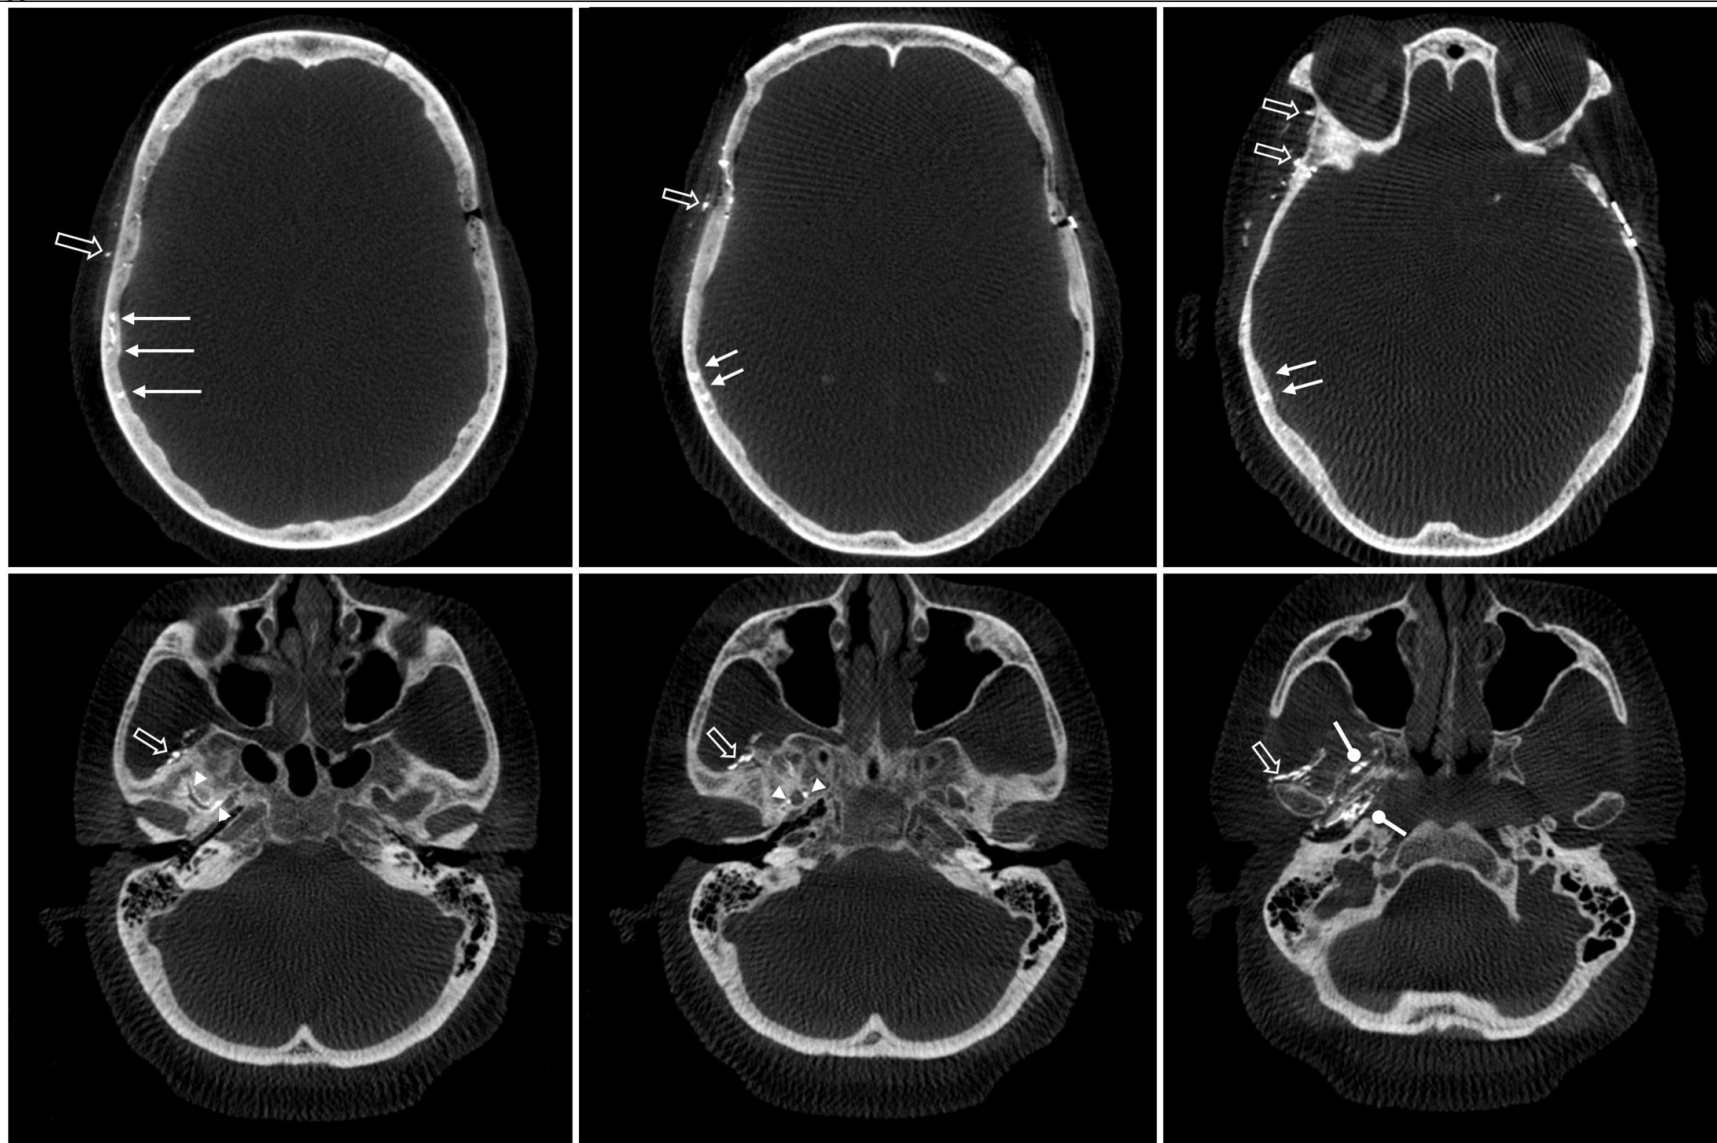

**Supplementary Figure 2. Typical axial MIP views of rotational angiography, in venous phase. (supplementary material)** Multiple diploic channels are opacified with contrast (arrows). There is transosseous emissary vein drainage into the temporalis venous plexus (open arrows). Tram-tracking middle meningeal sinus (arrowheads) drains via foramen ovale into the pterygopalatine venous plexus (ball arrow).
